# Supplementary material for: Differential effects of metal oxide nanoparticles on zebrafish embryos and developing larvae
Source: Royal Society of Chemistry journal article supplement (doi:10.1039/c8en00190a), 2018-01-01
Supplement: c8en00190a1.pdf [file c8en00190a1.pdf]

## Supporting Information

### Differential Effects of Metal Oxide Nanoparticles on Zebrafish Embryos and Developing Larvae

Guotao Peng<sup>1</sup>, Yuan He<sup>1</sup>, Mei Zhao<sup>1</sup>, Tianyu Yu<sup>1</sup>, Yao Qin<sup>2</sup>, Sijie Lin<sup>1,\*</sup>

<sup>1</sup>College of Environmental Science and Engineering, State Key Laboratory of Pollution Control and Resource Reuse, Shanghai Institute of Pollution Control and Ecological Security, Tongji University, Shanghai 200092, China;

<sup>2</sup>The Institute for Translational Nanomedicine, Shanghai East Hospital, The Institute for Biomedical Engineering and Nano Science, Tongji University, Shanghai 200092, China

Address Correspondence to:

Sijie Lin, Ph.D./Professor

College of Environmental Science and Engineering, Tongji University

1239 Siping Road, Shanghai 200092, China

Tel: 86 21 65982325

E-mail: [lin.sijie@tongji.edu.cn](mailto:lin.sijie@tongji.edu.cn)

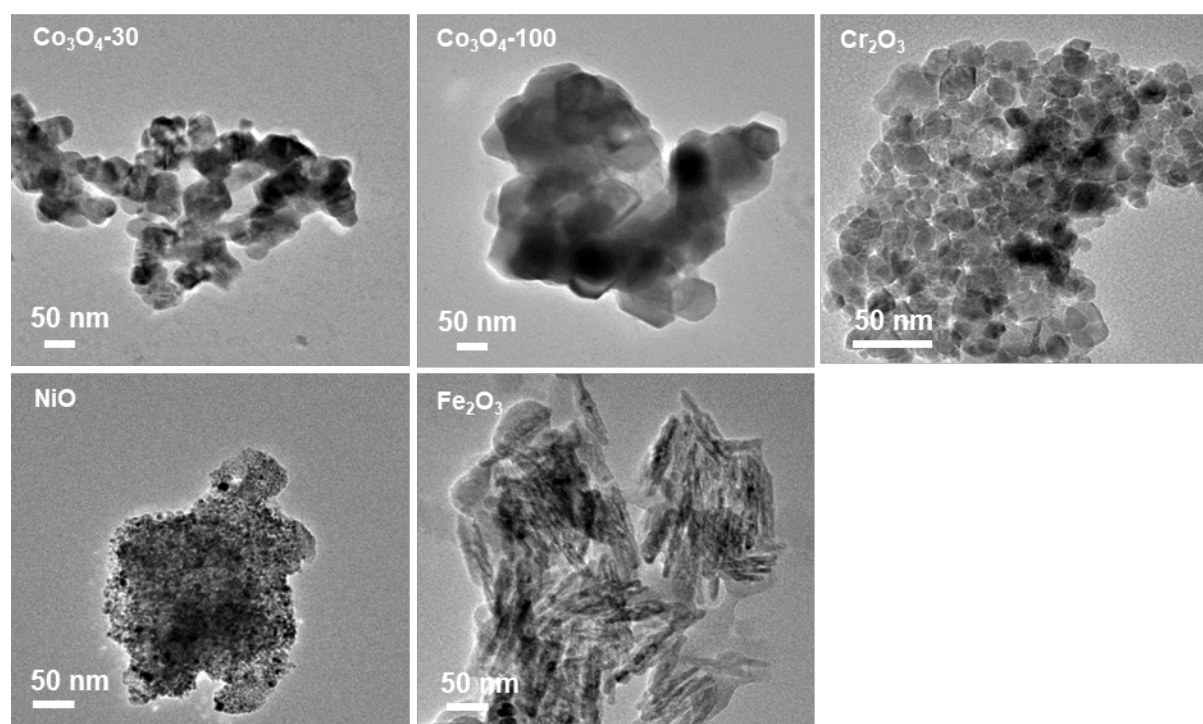

**Figure S1.** Representative TEM images of metal oxide nanoparticles (scale bar: 50 nm).

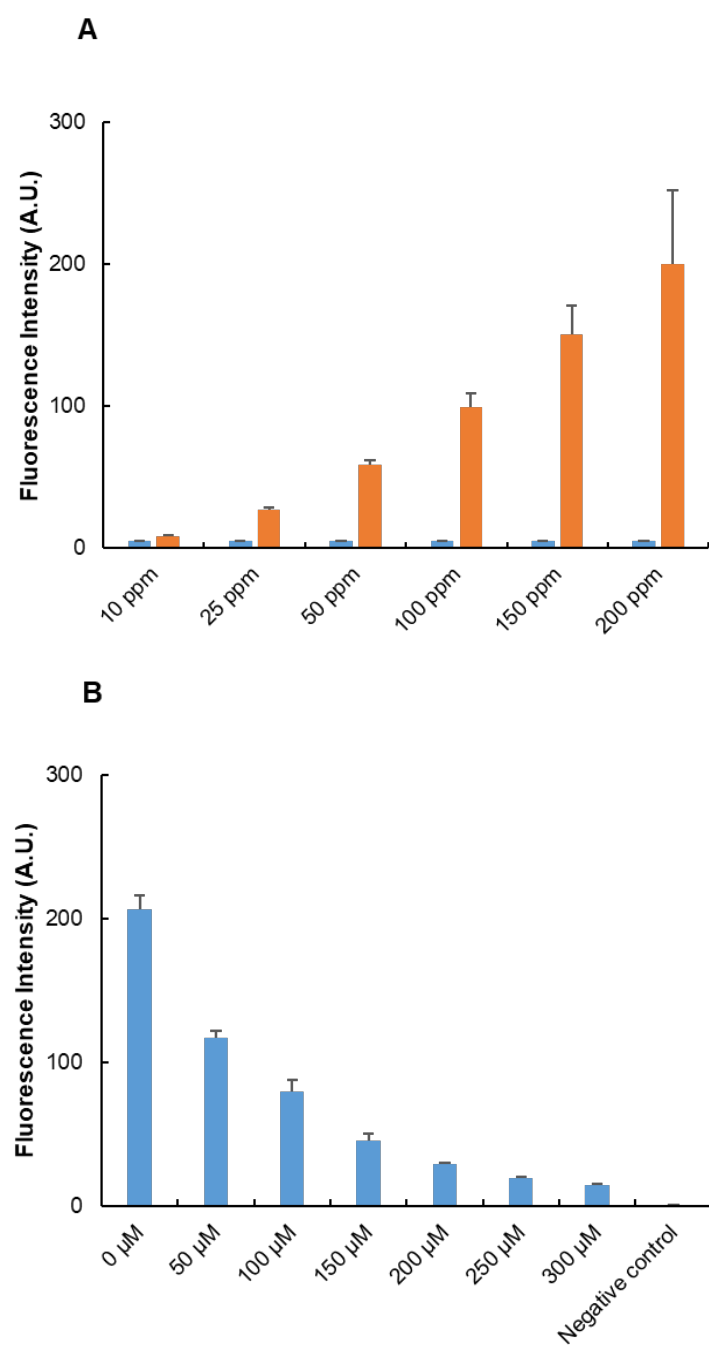

**Figure S2.** Abiotic ROS generation by NiO nanoparticles. (A) Concentration-dependent abiotic ROS generation by NiO nanoparticles based on DCF assay; (B) The effects of metal ion chelator (DTPA) on the abiotic ROS generation by NiO.

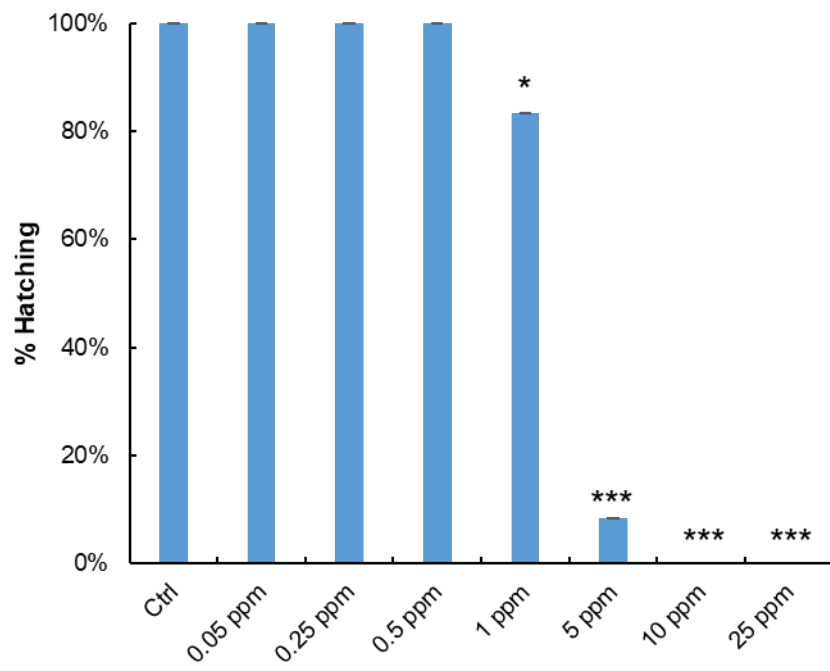

**Figure S3.** Concentration-dependent hatching interference exerted by NiO nanoparticles ( $p \leq 0.001$  \*\*\*,  $p \leq 0.01$  \*\*,  $p \leq 0.05$  \*).

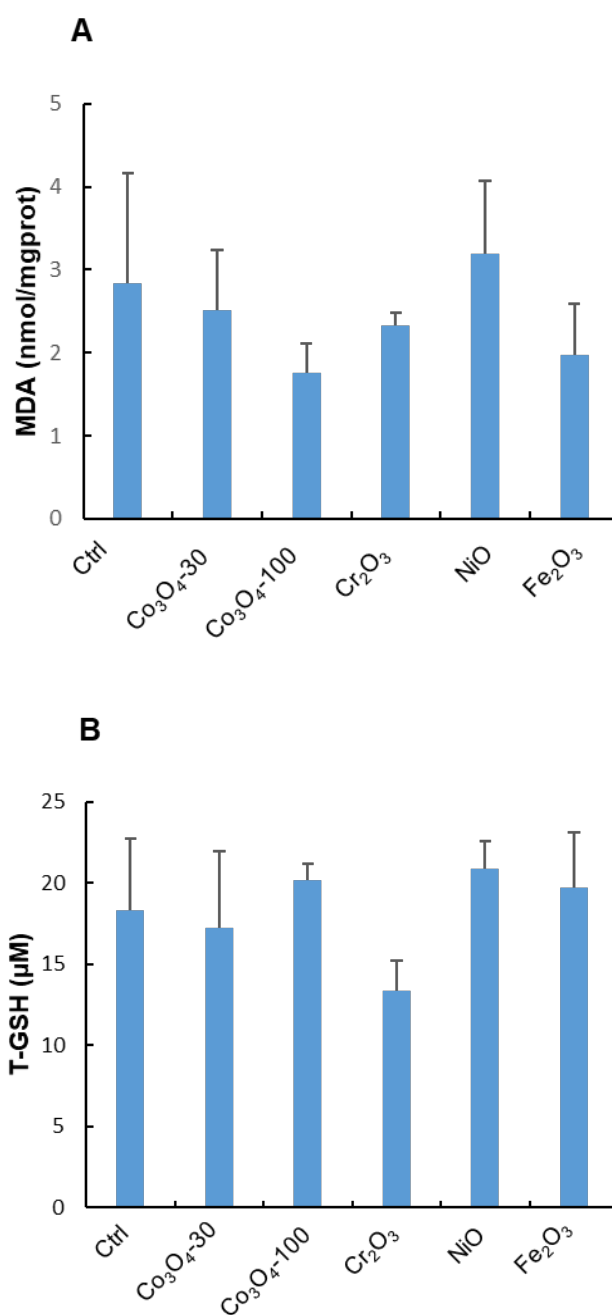

**Figure S4.** Assessment of biotic ROS generation based on lipid peroxidation and total GSH depletion. No significant difference was observed in MDA contents on embryos (A) and total GSH oxidation on 72 hpf larvae (B) after 24 h exposure of 200 ppm metal oxide nanoparticles.

| Pearson correlation analysis |                              |              | Pearson correlation coefficient | <i>P value</i>  |
|------------------------------|------------------------------|--------------|---------------------------------|-----------------|
| Abiotic assays               | Abiotic ROS vs. abiotic tGSH |              | <b>-0.98</b>                    | <b>7.33E-04</b> |
|                              | Abiotic ROS vs. biotic ROS   | Embryo       | 0.77                            | 0.071           |
|                              |                              | Larva        | <b>0.99</b>                     | <b>0.003</b>    |
| Biotic assays                | ROS vs. tGSH                 |              | <b>-0.88</b>                    | <b>0.000</b>    |
|                              | Embryo                       | ROS vs. MDA  | 0.50                            | 0.311           |
|                              |                              | tGSH vs. MDA | -0.78                           | 0.069           |
|                              |                              | ROS vs. tGSH | 0.41                            | 0.603           |
|                              | Larva                        | ROS vs. MDA  | 0.64                            | 0.170           |
|                              |                              | tGSH vs. MDA | -0.31                           | 0.543           |

**Table S1.** Pearson correlation analysis between abiotic ROS and biotic ROS, ROS and tGSH, ROS and MDA, tGSH and MDA assays.
